# Supplementary material
Source: PubMed Central journal article supplement (PMC4146426)
Supplement: NIHMS583559-supplement-01.pdf [file NIHMS583559-supplement-01.pdf]

**Figure Legends:**

**Supplemental Figure 1. Recurrence free survival after liver transplantation for HCC**

Kaplan-Meier survival curve showing recurrence free survival for all patients transplanted with known HCC (n = 285) in MELD era from 2002-2011.

**Supplemental Figure 2. Recurrence free survival after liver transplantation for imaging and pathology defined groups of patients transplanted for HCC**

Kaplan-Meier survival curves showing recurrence free survival for patients transplanted for HCC (1996-2011) (n = 358). **Group 1** was outside of Milan criteria on imaging and outside of Milan criteria on pathology examination (generally transplanted prior to adoption of Milan criteria). **Group 2** was within Milan criteria on imaging and outside of Milan criteria on pathology examination. **Group 3** was outside of Milan criteria on imaging and within Milan criteria on pathology examination (typically downstaged patients). **Group 4** was inside Milan criteria on imaging and on pathology examination. Group 2 is most equivalent to most of the CMM HCC patients. The *Clear and Confined* CMM HCC group had better recurrence free survival compared to group 2 with nodular HCC of similar scope and the *Other* group of CMM HCC had substantially worse recurrence free survival compared to group 2.
