# Supplementary material
Source: PubMed Central journal article supplement (PMC4146426)

Recurrence Free Survival

1.0  
0.8  
0.6  
0.4  
0.2  
0.0

0

500

1000

1500

2000

Days After Transplant

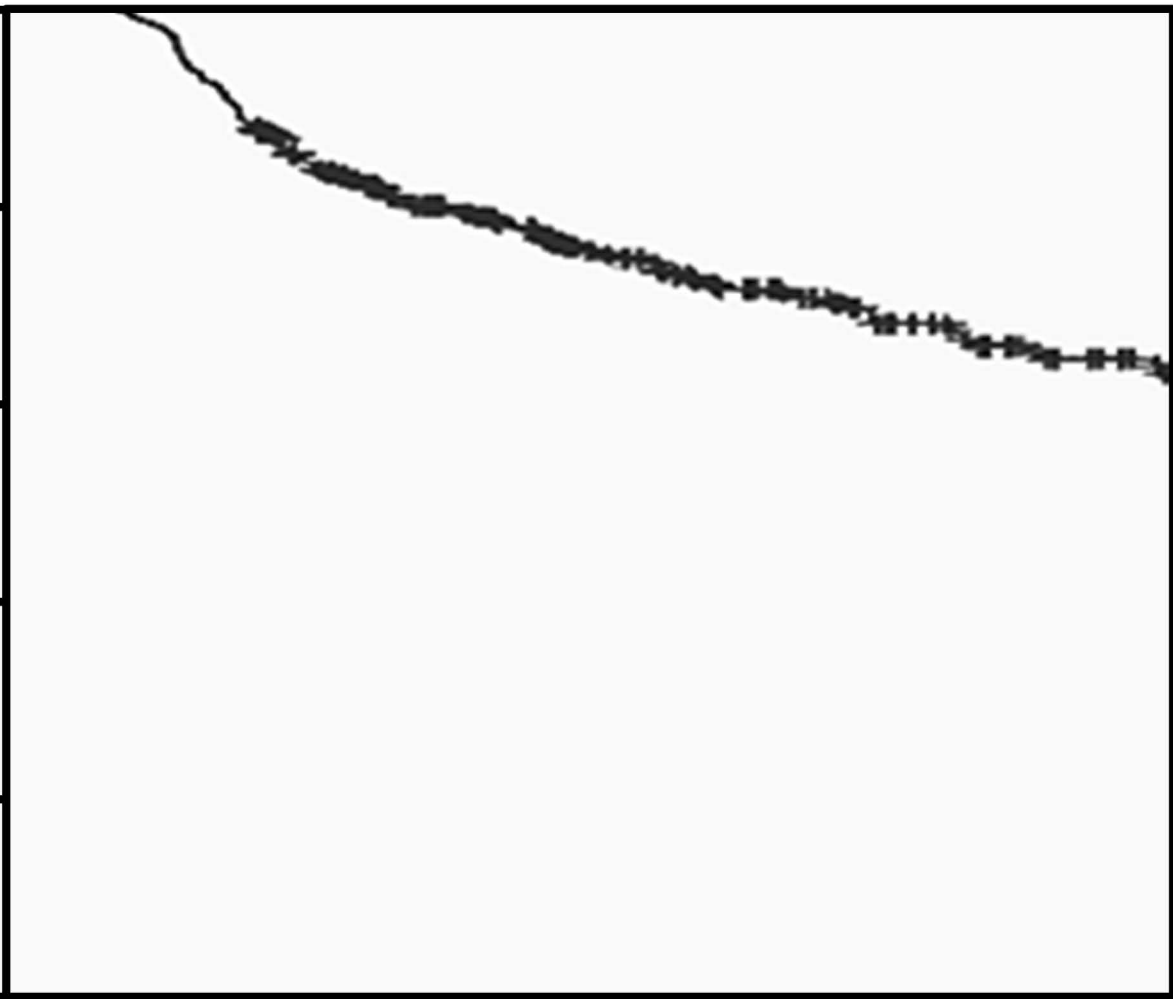

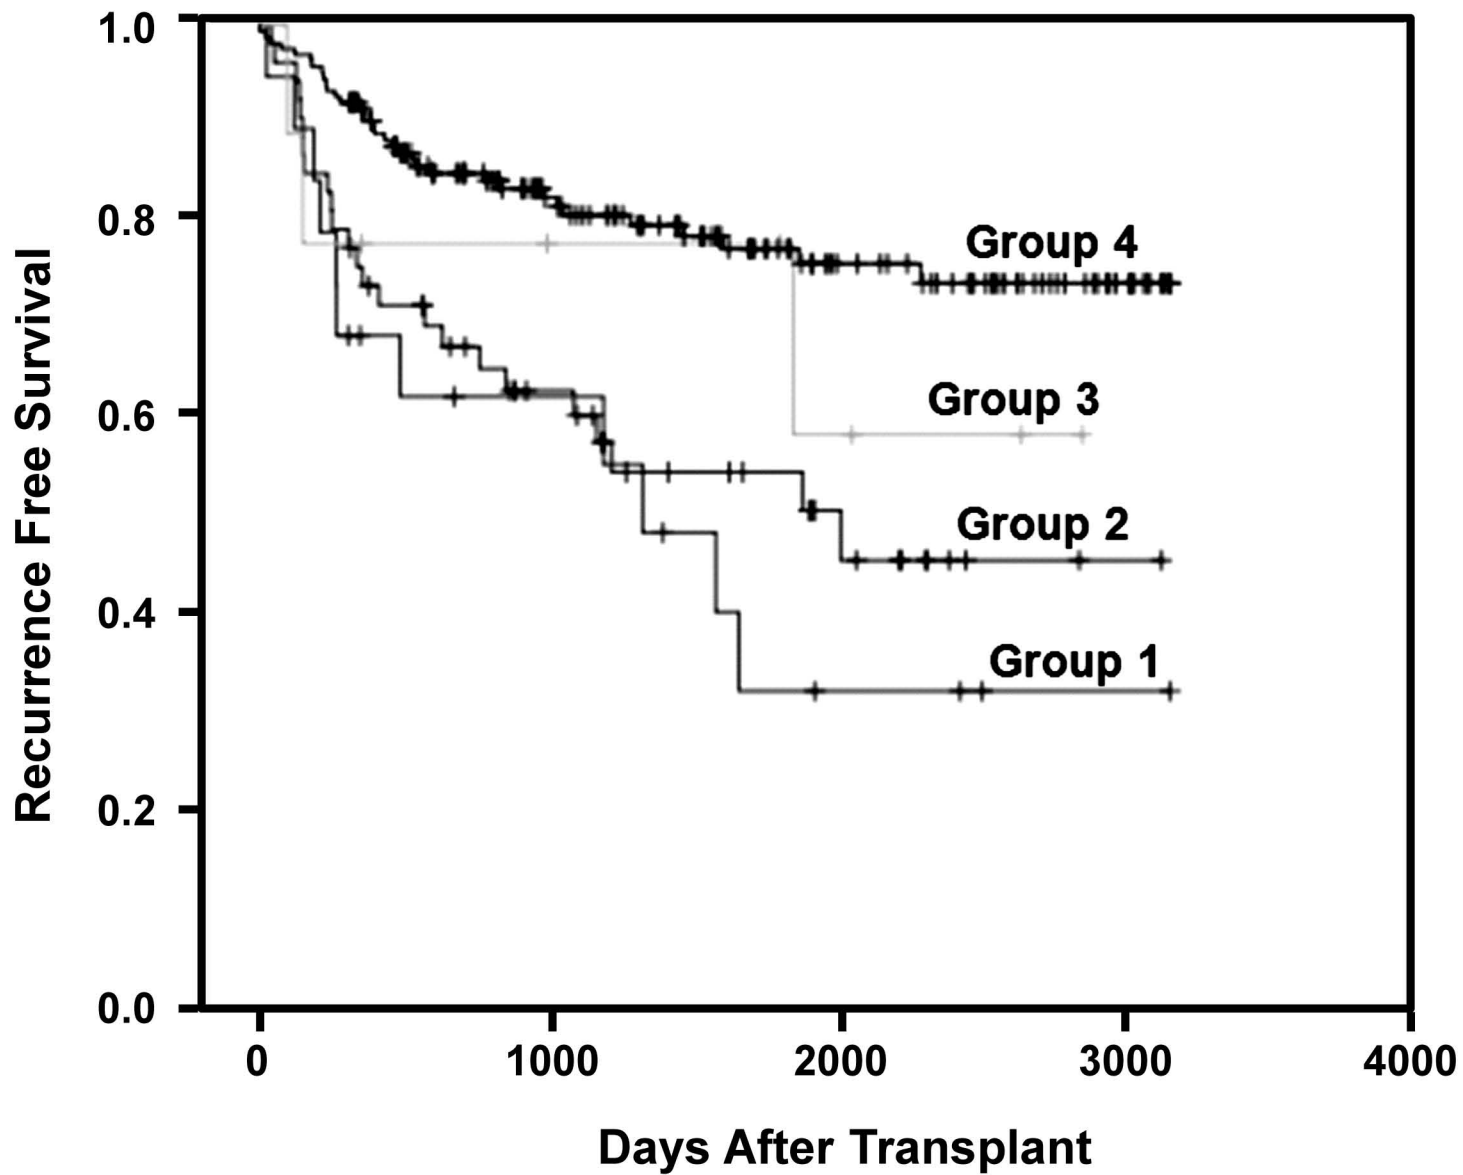

Supplement: NIHMS583559-supplement-Supp_FigureS1-S2.pdf [file NIHMS583559-supplement-Supp_FigureS1-S2.pdf]
